# Supplementary material for: Multifaceted roles of cohesin in regulating transcriptional loops
Source: PubMed Central journal article supplement — bioRxiv. 2024 Mar 27:2024.03.25.586715. Preprint. [Version 1] doi: 10.1101/2024.03.25.586715 (PMC10996690; doi:10.1101/2024.03.25.586715), 2024-03-27
Supplement: media-1.pdf [file media-1.pdf]

| Cell line | Treatment | Hours | Experiment | Factor | Source     | Library ID | Replicate | Combined into       | Combined into          | # of reads    | Orig. Complexes (F=1) | Repetitive regions filtered | Entropy/filtered (F=1) | Entropy filtered (F=1) | Enrich. Test FDR 0.1 (F=1) | Enrich. Test FDR 0.1 (F=1) | Enrich. Test FDR 0.2 (F=1) | Enrich. Test FDR 0.2 (F=1) |
|-----------|-----------|-------|------------|--------|------------|------------|-----------|---------------------|------------------------|---------------|-----------------------|-----------------------------|------------------------|------------------------|----------------------------|----------------------------|----------------------------|----------------------------|
| GM12878   | None      | 0     | ChIA-Drop  | CTCF   | This study | SHG0210    | Rep1-1    | GM12878-CTCF-Rep1   | GM12878-CTCF-pooled    | 53,809,034    | 791,544               | 618,965                     | 1,041,038              | 150,101                | NA                         | NA                         | NA                         | NA                         |
| GM12878   | None      | 0     | ChIA-Drop  | CTCF   | This study | SHG0211    | Rep1-2    | GM12878-CTCF-Rep1   | GM12878-CTCF-pooled    | 64,003,165    | 966,607               | 690,835                     | 1,179,567              | 163,843                | NA                         | NA                         | NA                         | NA                         |
| GM12878   | None      | 0     | ChIA-Drop  | CTCF   | This study | SHG0212    | Rep1-3    | GM12878-CTCF-Rep1   | GM12878-CTCF-pooled    | 87,724,974    | 1,341,844             | 1,027,220                   | 1,745,852              | 266,143                | NA                         | NA                         | NA                         | NA                         |
| GM12878   | None      | 0     | ChIA-Drop  | CTCF   | This study | SHG0213    | Rep1-4    | GM12878-CTCF-Rep1   | GM12878-CTCF-pooled    | 76,970,686    | 1,103,947             | 847,447                     | 1,400,215              | 232,071                | NA                         | NA                         | NA                         | NA                         |
| GM12878   | None      | 0     | ChIA-Drop  | CTCF   | This study | SHG0214    | Rep1-5    | GM12878-CTCF-Rep1   | GM12878-CTCF-pooled    | 89,647,949    | 2,583,586             | 2,099,266                   | 3,729,833              | 535,011                | NA                         | NA                         | NA                         | NA                         |
| GM12878   | None      | 0     | ChIA-Drop  | CTCF   | This study | SHG0215    | Rep1-6    | GM12878-CTCF-Rep1   | GM12878-CTCF-pooled    | 59,679,168    | 3,636,322             | 3,020,748                   | 5,471,716              | 824,716                | NA                         | NA                         | NA                         | NA                         |
| GM12878   | None      | 0     | ChIA-Drop  | CTCF   | This study | SHG0216    | Rep1      | GM12878-CTCF-Rep1   | SUM                    | 431,835,026   | 10,421,910            | 8,304,461                   | 14,568,321             | 2,171,885              | 1,446,321                  | 172,209                    | 3,829,611                  | 524,532                    |
| GM12878   | None      | 0     | ChIA-Drop  | CTCF   | This study | SHG0217    | Rep2-1    | GM12878-CTCF-Rep2   | GM12878-CTCF-pooled    | 95,786,946    | 1,838,463             | 1,469,135                   | 2,644,685              | 331,473                | NA                         | NA                         | NA                         | NA                         |
| GM12878   | None      | 0     | ChIA-Drop  | CTCF   | This study | SHG0218    | Rep2-2    | GM12878-CTCF-Rep2   | GM12878-CTCF-pooled    | 80,764,231    | 1,433,764             | 1,121,141                   | 1,978,236              | 256,894                | NA                         | NA                         | NA                         | NA                         |
| GM12878   | None      | 0     | ChIA-Drop  | CTCF   | This study | SHG0219    | Rep2-3    | GM12878-CTCF-Rep2   | GM12878-CTCF-pooled    | 72,844,914    | 1,188,792             | 935,629                     | 1,632,757              | 212,748                | NA                         | NA                         | NA                         | NA                         |
| GM12878   | None      | 0     | ChIA-Drop  | CTCF   | This study | SHG0220    | Rep2-4    | GM12878-CTCF-Rep2   | GM12878-CTCF-pooled    | 62,791,060    | 2,018,968             | 1,666,936                   | 3,021,846              | 382,237                | NA                         | NA                         | NA                         | NA                         |
| GM12878   | None      | 0     | ChIA-Drop  | CTCF   | This study | SHG0221    | Rep2-5    | GM12878-CTCF-Rep2   | GM12878-CTCF-pooled    | 89,781,816    | 1,486,451             | 1,210,392                   | 1,965,824              | 359,772                | NA                         | NA                         | NA                         | NA                         |
| GM12878   | None      | 0     | ChIA-Drop  | CTCF   | This study | SHG0222    | Rep2-6    | GM12878-CTCF-Rep2   | GM12878-CTCF-pooled    | 77,645,469    | 3,962,279             | 3,252,336                   | 5,692,687              | 1,029,915              | NA                         | NA                         | NA                         | NA                         |
| GM12878   | None      | 0     | ChIA-Drop  | CTCF   | This study | SHG0223    | Rep2      | GM12878-CTCF-Rep2   | SUM                    | 479,614,436   | 11,934,717            | 9,655,569                   | 16,936,035             | 2,573,039              | 1,574,468                  | 202,948                    | 4,372,322                  | 636,262                    |
| GM12878   | None      | 0     | ChIA-Drop  | CTCF   | This study | SHG0224    | Rep3-1    | GM12878-CTCF-Rep3   | GM12878-CTCF-pooled    | 51,695,102    | 723,738               | 543,326                     | 875,400                | 142,541                | NA                         | NA                         | NA                         | NA                         |
| GM12878   | None      | 0     | ChIA-Drop  | CTCF   | This study | SHG0225    | Rep3-2    | GM12878-CTCF-Rep3   | GM12878-CTCF-pooled    | 69,463,568    | 704,855               | 438,847                     | 723,384                | 105,057                | NA                         | NA                         | NA                         | NA                         |
| GM12878   | None      | 0     | ChIA-Drop  | CTCF   | This study | SHG0226    | Rep3-3    | GM12878-CTCF-Rep3   | GM12878-CTCF-pooled    | 64,024,493    | 715,163               | 560,346                     | 927,602                | 134,599                | NA                         | NA                         | NA                         | NA                         |
| GM12878   | None      | 0     | ChIA-Drop  | CTCF   | This study | SHG0227    | Rep3-4    | GM12878-CTCF-Rep3   | GM12878-CTCF-pooled    | 63,853,377    | 572,485               | 432,749                     | 710,710                | 103,414                | NA                         | NA                         | NA                         | NA                         |
| GM12878   | None      | 0     | ChIA-Drop  | CTCF   | This study | SHG0228    | Rep3-5    | GM12878-CTCF-Rep3   | GM12878-CTCF-pooled    | 50,095,683    | 520,952               | 412,727                     | 731,855                | 70,338                 | NA                         | NA                         | NA                         | NA                         |
| GM12878   | None      | 0     | ChIA-Drop  | CTCF   | This study | SHG0229    | Rep3-6    | GM12878-CTCF-Rep3   | GM12878-CTCF-pooled    | 83,797,446    | 2,750,133             | 2,205,832                   | 4,488,489              | 244,101                | NA                         | NA                         | NA                         | NA                         |
| GM12878   | None      | 0     | ChIA-Drop  | CTCF   | This study | SHG0230    | Rep3      | GM12878-CTCF-Rep3   | SUM                    | 382,929,669   | 5,997,326             | 4,593,827                   | 8,457,450              | 800,050                | 1,311,673                  | 123,156                    | 3,100,214                  | 319,744                    |
| GM12878   | None      | 0     | ChIA-Drop  | CTCF   | This study | SHG0231    | pooled    | GM12878-CTCF-pooled | SUM                    | 1,294,379,311 | 28,358,883            | 22,553,857                  | 39,961,806             | 5,544,974              | 3,860,627                  | 438,452                    | 10,130,243                 | 1,315,778                  |
| GM12878   | None      | 0     | ChIA-Drop  | RAD21  | This study | SHG0180    | Rep1-1    | GM12878-RAD21-Rep1  | GM12878-cohesin-pooled | 86,737,328    | 5,114,489             | 4,396,204                   | 9,438,034              | 619,616                | NA                         | NA                         | NA                         | NA                         |
| GM12878   | None      | 0     | ChIA-Drop  | RAD21  | This study | SHG0195    | Rep1-2    | GM12878-RAD21-Rep1  | GM12878-cohesin-pooled | 156,888,617   | 8,172,660             | 6,922,948                   | 15,658,707             | 1,157,328              | NA                         | NA                         | NA                         | NA                         |
| GM12878   | None      | 0     | ChIA-Drop  | RAD21  | This study | SHG0198    | Rep1-3    | GM12878-RAD21-Rep1  | GM12878-cohesin-pooled | 56,143,013    | 3,451,076             | 2,973,641                   | 6,186,579              | 386,731                | NA                         | NA                         | NA                         | NA                         |
| GM12878   | None      | 0     | ChIA-Drop  | RAD21  | This study | SHG0202    | Rep1-4    | GM12878-RAD21-Rep1  | GM12878-cohesin-pooled | 185,966,786   | 9,377,136             | 7,921,234                   | 18,477,807             | 1,300,248              | NA                         | NA                         | NA                         | NA                         |
| GM12878   | None      | 0     | ChIA-Drop  | RAD21  | This study | SHG0205    | Rep1-5    | GM12878-RAD21-Rep1  | GM12878-cohesin-pooled | 130,723,974   | 8,069,067             | 7,027,539                   | 16,154,497             | 1,035,487              | NA                         | NA                         | NA                         | NA                         |
| GM12878   | None      | 0     | ChIA-Drop  | RAD21  | This study | SHG0206    | Rep1-6    | GM12878-RAD21-Rep1  | GM12878-cohesin-pooled | 193,804,186   | 8,792,169             | 7,638,724                   | 17,749,761             | 1,185,566              | NA                         | NA                         | NA                         | NA                         |
| GM12878   | None      | 0     | ChIA-Drop  | RAD21  | This study | SHG0207    | Rep1-7    | GM12878-RAD21-Rep1  | GM12878-cohesin-pooled | 62,793,728    | 4,378,656             | 3,794,757                   | 7,909,865              | 587,478                | NA                         | NA                         | NA                         | NA                         |
| GM12878   | None      | 0     | ChIA-Drop  | RAD21  | This study | SHG0208    | Rep1      | GM12878-RAD21-Rep1  | SUM                    | 841,877,686   | 47,355,253            | 40,673,057                  | 91,575,250             | 6,272,454              | 24,040,443                 | 2,354,936                  | 38,564,652                 | 3,814,289                  |
| GM12878   | None      | 0     | ChIA-Drop  | RAD21  | This study | SHG0181    | Rep2-1    | GM12878-RAD21-Rep2  | GM12878-cohesin-pooled | 84,530,899    | 8,855,167             | 7,066,326                   | 10,806,732             | 857,395                | NA                         | NA                         | NA                         | NA                         |
| GM12878   | None      | 0     | ChIA-Drop  | RAD21  | This study | SHG0196    | Rep2-2    | GM12878-RAD21-Rep2  | GM12878-cohesin-pooled | 156,415,452   | 9,227,264             | 7,966,428                   | 17,914,120             | 1,615,428              | NA                         | NA                         | NA                         | NA                         |
| GM12878   | None      | 0     | ChIA-Drop  | RAD21  | This study | SHG0199    | Rep2-3    | GM12878-RAD21-Rep2  | GM12878-cohesin-pooled | 102,445,657   | 5,881,573             | 4,992,295                   | 11,148,999             | 901,052                | NA                         | NA                         | NA                         | NA                         |
| GM12878   | None      | 0     | ChIA-Drop  | RAD21  | This study | SHG0203    | Rep2-4    | GM12878-RAD21-Rep2  | GM12878-cohesin-pooled | 191,995,737   | 11,257,732            | 9,780,145                   | 23,216,948             | 2,011,434              | NA                         | NA                         | NA                         | NA                         |
| GM12878   | None      | 0     | ChIA-Drop  | RAD21  | This study | SHG0208    | Rep2-5    | GM12878-RAD21-Rep2  | GM12878-cohesin-pooled | 88,451,827    | 4,531,214             | 3,915,771                   | 8,216,029              | 601,217                | NA                         | NA                         | NA                         | NA                         |
| GM12878   | None      | 0     | ChIA-Drop  | RAD21  | This study | SHG0209    | Rep2-6    | GM12878-RAD21-Rep2  | GM12878-cohesin-pooled | 79,128,174    | 4,108,693             | 4,138,099                   | 8,709,449              | 652,205                | NA                         | NA                         | NA                         | NA                         |
| GM12878   | None      | 0     | ChIA-Drop  | RAD21  | This study | SHG0232    | Rep2      | GM12878-RAD21-Rep2  | SUM                    | 682,867,746   | 41,561,663            | 35,859,064                  | 80,012,277             | 6,638,731              | 19,156,824                 | 2,049,377                  | 30,243,718                 | 3,641,468                  |
| GM12878   | None      | 0     | ChIA-Drop  | RNAPI  | This study | SHG0304    | Rep1-1    | GM12878-RNAPI-Rep1  | GM12878-RNAPI-pooled   | 79,192,522    | 3,149,655             | 2,545,237                   | 5,250,602              | 280,345                | NA                         | NA                         | NA                         | NA                         |
| GM12878   | None      | 0     | ChIA-Drop  | RNAPI  | This study | SHG0300    | Rep1-2    | GM12878-RNAPI-Rep1  | GM12878-RNAPI-pooled   | 65,226,738    | 2,035,305             | 1,681,315                   | 3,390,414              | 175,460                | NA                         | NA                         | NA                         | NA                         |
| GM12878   | None      | 0     | ChIA-Drop  | RNAPI  | This study | SHG0305    | Rep1-3    | GM12878-RNAPI-Rep1  | GM12878-RNAPI-pooled   | 73,220,406    | 1,913,204             | 1,583,783                   | 3,175,672              | 165,945                | NA                         | NA                         | NA                         | NA                         |
| GM12878   | None      | 0     | ChIA-Drop  | RNAPI  | This study | SHG0306    | Rep1-4    | GM12878-RNAPI-Rep1  | GM12878-RNAPI-pooled   | 68,385,904    | 1,475,063             | 1,180,104                   | 1,939,470              | 337,391                | NA                         | NA                         | NA                         | NA                         |
| GM12878   | None      | 0     | ChIA-Drop  | RNAPI  | This study | SHG0307    | Rep1-5    | GM12878-RNAPI-Rep1  | GM12878-RNAPI-pooled   | 64,871,999    | 1,345,206             | 1,052,235                   | 1,736,384              | 290,936                | NA                         | NA                         | NA                         | NA                         |
| GM12878   | None      | 0     | ChIA-Drop  | RNAPI  | This study | SHG0308    | Rep1      | GM12878-RNAPI-Rep1  | SUM                    | 344,959,750   | 9,918,433             | 8,042,674                   | 15,492,542             | 1,249,977              | 498,661                    | 49,328                     | 1,625,961                  | 176,301                    |
| GM12878   | None      | 0     | ChIA-Drop  | RNAPI  | This study | SHG0312    | Rep2-1    | GM12878-RNAPI-Rep2  | GM12878-RNAPI-pooled   | 67,273,144    | 837,532               | 631,102                     | 784,063                | 300,071                | NA                         | NA                         | NA                         | NA                         |
| GM12878   | None      | 0     | ChIA-Drop  | RNAPI  | This study | SHG0316    | Rep2-2    | GM12878-RNAPI-Rep2  | GM12878-RNAPI-pooled   | 63,420,334    | 2,044,875             | 1,649,997                   | 2,681,333              | 158,143                | NA                         | NA                         | NA                         | NA                         |
| GM12878   | None      | 0     | ChIA-Drop  | RNAPI  | This study | SHG0317    | Rep2-3    | GM12878-RNAPI-Rep2  | GM12878-RNAPI-pooled   | 73,220,406    | 1,913,204             | 1,115,339                   | 1,493,472              | 505,336                | NA                         | NA                         | NA                         | NA                         |
| GM12878   | None      | 0     | ChIA-Drop  | RNAPI  | This study | SHG0318    | Rep2-4    | GM12878-RNAPI-Rep2  | GM12878-RNAPI-pooled   | 50,726,668    | 3,737,580             | 3,107,110                   | 5,080,083              | 128,344                | NA                         | NA                         | NA                         | NA                         |
| GM12878   | None      | 0     | ChIA-Drop  | RNAPI  | This study | SHG0218    | Rep2-5    | GM12878-RNAPI-Rep2  | GM12878-RNAPI-pooled   | 57,701,716    | 1,348,602             | 1,079,930                   | 1,973,798              | 201,193                | NA                         | NA                         | NA                         | NA                         |
| GM12878   | None      | 0     | ChIA-Drop  | RNAPI  | This study | SHG0219    | Rep2-6    | GM12878-RNAPI-Rep2  | GM12878-RNAPI-pooled   | 57,662,440    | 1,402,528             | 1,157,338                   | 2,129,293              | 209,548                | NA                         | NA                         | NA                         | NA                         |
| GM12878   | None      | 0     | ChIA-Drop  | RNAPI  | This study | SHG0234    | Rep2      | GM12878-RNAPI-Rep2  | SUM                    | 370,504,708   | 10,882,321            | 8,741,316                   | 14,142,041             | 2,962,835              | 1,766,059                  | 324,424                    | 4,009,518                  | 802,527                    |
| GM12878   | None      | 0     | ChIA-Drop  | RNAPI  | This study | SHG0235    | Rep3-1    | GM12878-RNAPI-Rep3  | GM12878-RNAPI-pooled   | 77,820,387    | 1,783,676             | 1,516,515                   | 2,835,101              | 266,991                | NA                         | NA                         | NA                         | NA                         |
| GM12878   | None      | 0     | ChIA-Drop  | RNAPI  | This study | SHG0236    | Rep3-2    | GM12878-RNAPI-Rep3  | GM12878-RNAPI-pooled   | 87,702,678    | 6,465,918             | 5,715,047                   | 12,226,757             | 1,065,348              | NA                         | NA                         | NA                         | NA                         |
| GM12878   | None      | 0     | ChIA-Drop  | RNAPI  | This study | SHG0237    | Rep3-3    | GM12878-RNAPI-Rep3  | GM12878-RNAPI-pooled   | 51,695,102    | 1,913,204             | 1,583,783                   | 3,175,672              | 165,945                | NA                         | NA                         | NA                         | NA                         |
| GM12878   | None      | 0     | ChIA-Drop  | RNAPI  | This study | SHG0239    | Rep3-4    | GM12878-RNAPI-Rep3  | GM12878-RNAPI-pooled   | 94,222,395    | 2,915,656             | 2,447,198                   | 4,779,894              | 425,597                | NA                         | NA                         | NA                         | NA                         |
| GM12878   | None      | 0     | ChIA-Drop  | RNAPI  | This study | SHG0239    | Rep3      | GM12878-RNAPI-Rep3  | SUM                    | 338,284,914   | 11,788,961            | 10,117,183                  | 20,591,900             | 1,847,269              | 7,280,510                  | 911,544                    |                            |                            |

| Cell line | Treatment     | Hours | Experiment     | Factor  | Source             | Library ID   | # of reads |
|-----------|---------------|-------|----------------|---------|--------------------|--------------|------------|
| GM12878   | None          | 0     | ChIP-seq       | NIPBL   | This study         | CHG0030      | 61,848,343 |
| GM12878   | None          | 0     | ChIP-seq       | CTCF    | This study         | CHG0031      | 77,693,935 |
| GM12878   | None          | 0     | ChIP-seq       | WAPL    | This study         | CHG0032      | 47,004,834 |
| GM12878   | None          | 0     | ChIP-seq       | Input   | This study         | CHG0033      | 57,104,734 |
| GM12878   | None          | 0     | ChIP-seq       | RAD21   | This study         | CHG0034      | 56,474,262 |
| GM12878   | None          | 0     | ChIP-seq       | H3K27ac | ENCODE consortium  | ENCFF340JIF  | 36,793,809 |
| GM12878   | None          | 0     | ChIP-seq       | H3K4me1 | ENCODE consortium  | ENCFF831ZHL  | 63,144,095 |
| GM12878   | None          | 0     | chromHMM       | N/A     | Broad inst. UCSC   | N/A          | N/A        |
| GM12878   | None          | 0     | Super-enhancer | N/A     | Hsniz et al., 2013 | N/A          | N/A        |
| GM12878   | None          | 0     | CTCF motif     | N/A     | Tang et al., 2015  | N/A          | N/A        |
| HCT116    | RAD-mAC-auxin | 0     | ChIP-seq       | RAD21   | This study         | CHH0056      | 78,476,992 |
| HCT116    | RAD-mAC-auxin | 6     | ChIP-seq       | RAD21   | This study         | CHH0057      | 90,082,366 |
| HCT116    | RAD-mAC-auxin | 9     | ChIP-seq       | RAD21   | This study         | CHH0058      | 76,173,734 |
| HCT116    | RAD-mAC-auxin | 12    | ChIP-seq       | RAD21   | This study         | CHH0059      | 99,661,912 |
| HCT116    | RAD-mAC-auxin | 0     | ChIP-seq       | CTCF    | This study         | CHH0060      | 86,801,317 |
| HCT116    | RAD-mAC-auxin | 6     | ChIP-seq       | CTCF    | This study         | CHH0061      | 93,779,737 |
| HCT116    | RAD-mAC-auxin | 9     | ChIP-seq       | CTCF    | This study         | CHH0062      | 68,463,927 |
| HCT116    | RAD-mAC-auxin | 12    | ChIP-seq       | CTCF    | This study         | CHH0063      | 96,902,097 |
| HCT116    | RAD-mAC-auxin | 0     | ChIP-seq       | RNAPII  | This study         | CHH0064      | 90,338,263 |
| HCT116    | RAD-mAC-auxin | 6     | ChIP-seq       | RNAPII  | This study         | CHH0065      | 76,276,878 |
| HCT116    | RAD-mAC-auxin | 9     | ChIP-seq       | RNAPII  | This study         | CHH0066      | 82,799,502 |
| HCT116    | RAD-mAC-auxin | 12    | ChIP-seq       | RNAPII  | This study         | CHH0067      | 95,021,331 |
| HCT116    | RAD-mAC-auxin | 0     | Repli-seq      | N/A     | 4D Nucleome        | 4DNESNGZM5FG | N/A        |
| HCT116    | RAD-mAC-auxin | 6     | Repli-seq      | N/A     | 4D Nucleome        | 4DNES92AU9JR | N/A        |
| HCT116    | None          | 0     | chromHMM       | N/A     | ENCODE consortium  | ENCFF513PJK  | N/A        |
| HCT116    | None          | 0     | Super-enhancer | N/A     | Hsniz et al., 2013 | N/A          | N/A        |
| MCF7      | None          | 0     | chromHMM       | N/A     | ENCODE consortium  | ENCFF506GEX  | N/A        |
| K562      | None          | 0     | chromHMM       | N/A     | Broad inst. UCSC   | N/A          | N/A        |
| HepG2     | None          | 0     | chromHMM       | N/A     | Broad inst. UCSC   | N/A          | N/A        |
| H1        | None          | 0     | chromHMM       | N/A     | Broad inst. UCSC   | N/A          | N/A        |

| Cell line | Treatment     | Hours | Experiment | Source            | Library ID  | # of reads  |
|-----------|---------------|-------|------------|-------------------|-------------|-------------|
| GM12878   | None          | 0     | RNA-seq    | ENCODE consortium | ENCLB555AQG | 117,876,320 |
| HCT116    | RAD-mAC-auxin | 0     | RNA-seq    | This study        | RHH0001     | 41,471,532  |
| HCT116    | RAD-mAC-auxin | 0     | RNA-seq    | This study        | RHH0005     | 69,861,080  |
| HCT116    | RAD-mAC-auxin | 6     | RNA-seq    | This study        | RHH0002     | 54,085,738  |
| HCT116    | RAD-mAC-auxin | 6     | RNA-seq    | This study        | RHH0006     | 74,474,501  |
| HCT116    | RAD-mAC-auxin | 9     | RNA-seq    | This study        | RHH0003     | 56,290,599  |
| HCT116    | RAD-mAC-auxin | 9     | RNA-seq    | This study        | RHH0007     | 57,358,596  |
| HCT116    | RAD-mAC-auxin | 12    | RNA-seq    | This study        | RHH0004     | 52,650,577  |
| HCT116    | RAD-mAC-auxin | 12    | RNA-seq    | This study        | RHH0008     | 66,396,860  |
| H1        | None          | 0     | RNA-seq    | ENCODE consortium | ENCLB555AMA | 125,395,196 |
| K562      | None          | 0     | RNA-seq    | ENCODE consortium | ENCLB555AKN | 113,588,758 |
| HepG2     | None          | 0     | RNA-seq    | ENCODE consortium | ENCLB555AQD | 124,172,649 |
| MCF7      | None          | 0     | RNA-seq    | ENCODE consortium | ENCLB555AQN | 128,178,110 |

| Cell line              | Treatment | Hours | Experiment | Source     | Probe loci  | # of nuclei | # of pairs | # of distances | Supp. Videos |
|------------------------|-----------|-------|------------|------------|-------------|-------------|------------|----------------|--------------|
| HCT116/RAD21-mAC/dCas9 | None      | 0     | Casilio    | This study | <i>BCL6</i> | 21          | 27         | 1107           | S1           |
| HCT116/RAD21-mAC/dCas9 | Auxin     | 24    | Casilio    | This study | <i>BCL6</i> | 26          | 38         | 1484           | S2           |
| HCT116/RAD21-mAC/dCas9 | None      | 0     | Casilio    | This study | <i>SOX9</i> | 17          | 31         | 1166           | S3           |
| HCT116/RAD21-mAC/dCas9 | Auxin     | 24    | Casilio    | This study | <i>SOX9</i> | 15          | 23         | 943            | S4           |

| Cell line                                              | GM12878    | GM12878    | GM12878    | GM12878    | GM12878    | GM12878    | GM12878    | GM12878    | GM12878    | GM12878    | GM12878    | GM12878 |
|--------------------------------------------------------|------------|------------|------------|------------|------------|------------|------------|------------|------------|------------|------------|---------|
| IP-factor                                              | CTCF       | CTCF       | CTCF       | CTCF       | CTCF       | CTCF       | CTCF       | CTCF       | CTCF       | CTCF       | CTCF       | CTCF    |
| lib                                                    | SHG0193    | SHG0210    | SHG0211    | SHG0212    | SHG0213    | SHG0214    | SHG0215    | SHG0216    | SHG0217    | SHG8033    | SHG8035    | hg38    |
| Ref. Genome                                            | hg38       | hg38       | hg38       | hg38       | hg38       | hg38       | hg38       | hg38       | hg38       | hg38       | hg38       | hg38    |
| pcr_duplication                                        | 0.02846304 | 0.02232472 | 0.02911794 | 0.03511322 | 0.02911747 | 0.03527989 | 0.03000722 | 0.02844855 | 0.02422908 | 0.02405731 | 0.0474847  |         |
| Total_PET (Paired_end reads)                           | 50,095,683 | 53,809,034 | 64,003,215 | 87,724,974 | 76,970,686 | 95,786,946 | 80,764,231 | 72,844,914 | 62,791,060 | 51,695,102 | 83,797,446 |         |
| PET_with_BC (BarCode)                                  | 39,872,030 | 42,176,374 | 50,948,959 | 69,070,748 | 60,371,463 | 78,497,190 | 65,747,475 | 57,541,619 | 55,393,822 | 36,833,007 | 71,371,861 |         |
| Uniq_Mappable_reads (R1)                               | 37,204,747 | 39,818,903 | 48,053,958 | 64,921,051 | 56,875,230 | 73,763,730 | 61,661,275 | 53,795,101 | 52,562,678 | 35,146,861 | 69,353,579 |         |
| Reads_mapq>=30                                         | 27,457,413 | 29,156,604 | 34,244,792 | 47,531,107 | 41,776,872 | 55,753,439 | 45,905,695 | 39,568,073 | 41,989,305 | 24,343,565 | 53,326,491 |         |
| Reads_q>=30 & len>=50bp                                | 25,969,870 | 27,773,006 | 32,681,246 | 45,168,473 | 39,719,788 | 53,002,068 | 43,632,326 | 37,493,110 | 40,221,986 | 23,192,800 | 51,497,910 |         |
| Reads_q>=30 & len>=50bp & 3'ext500                     | 25,547,959 | 27,378,204 | 32,165,303 | 44,540,686 | 39,178,246 | 52,265,577 | 43,001,284 | 36,975,642 | 39,888,849 | 22,970,144 | 50,900,386 |         |
| Reads_q>=30 & len>=50bp & 3'ext500 & MAJOR_CHROM       | 25,547,959 | 27,378,204 | 32,165,303 | 44,540,686 | 39,178,246 | 52,265,577 | 43,001,284 | 36,975,642 | 39,888,849 | 22,970,144 | 50,900,386 |         |
| BC_count_of_PET-w/-BC (BarCode)                        | 1,772,481  | 1,762,747  | 1,865,890  | 2,016,988  | 1,917,566  | 2,089,977  | 1,959,526  | 1,937,727  | 1,829,715  | 2,102,213  | 2,386,536  |         |
| BC_of_Uniq_Mappable_reads (R1)                         | 1,747,622  | 1,741,282  | 1,839,903  | 1,990,117  | 1,892,314  | 2,060,361  | 1,930,980  | 1,910,217  | 1,807,211  | 2,083,999  | 2,369,710  |         |
| BC_of_Reads_q>=30 & len>=50bp & 3'ext500 & MAJOR_CHROM | 1,596,356  | 1,594,196  | 1,679,722  | 1,817,450  | 1,728,402  | 1,903,802  | 1,778,739  | 1,759,094  | 1,688,512  | 1,940,561  | 2,243,710  |         |
| GEM_TOTAL                                              | 1,596,356  | 1,594,196  | 1,679,722  | 1,817,450  | 1,728,402  | 1,903,802  | 1,778,739  | 1,759,094  | 1,688,512  | 1,940,561  | 2,243,710  |         |
| GEM_singleFrag                                         | 444,317    | 440,807    | 519,437    | 527,685    | 491,659    | 544,079    | 516,730    | 502,183    | 405,159    | 620,589    | 564,290    |         |
| GEM_multiFrag                                          | 1,152,039  | 1,153,389  | 1,160,285  | 1,289,765  | 1,236,743  | 1,359,723  | 1,262,009  | 1,256,911  | 1,283,353  | 1,319,972  | 1,679,420  |         |
| GEM_of_intra_chrom                                     | 18,514     | 14,662     | 13,683     | 12,180     | 13,282     | 9,194      | 9,651      | 11,347     | 5,367      | 25,332     | 10,573     |         |
| GEM_of_inter_chrom                                     | 1,133,525  | 1,138,727  | 1,146,602  | 1,277,585  | 1,223,461  | 1,350,529  | 1,252,358  | 1,245,564  | 1,277,986  | 1,294,640  | 1,668,847  |         |
| GEM_of_inter_chrom_divby_chrom_has_multiFrag           | 502,438    | 776,882    | 950,984    | 1,329,664  | 1,090,665  | 1,829,269  | 1,430,113  | 1,177,445  | 2,013,601  | 708,406    | 2,739,560  |         |
| GEM_of_inter_chrom_divby_chrom_has_singleFrag          | 3,811,330  | 4,209,325  | 4,486,721  | 5,343,336  | 4,833,333  | 6,257,545  | 5,482,278  | 5,136,950  | 6,347,235  | 4,321,196  | 8,633,129  |         |
| GEM_of_TOTAL_SA (SingleFrag+IntraFrag)                 | 4,776,599  | 5,441,676  | 5,970,825  | 7,212,865  | 6,428,939  | 8,640,087  | 7,438,772  | 6,827,925  | 8,771,362  | 5,675,523  | 11,947,552 |         |
| GEM_with_Frag=1                                        | 4,255,647  | 4,650,132  | 5,006,158  | 5,871,021  | 5,324,992  | 6,801,624  | 5,999,008  | 5,639,133  | 6,752,394  | 4,941,785  | 9,197,419  |         |
| GEM_with_Frag=2                                        | 451,522    | 646,944    | 766,429    | 1,033,107  | 863,940    | 1,385,716  | 1,107,676  | 938,347    | 1,506,691  | 598,865    | 2,090,724  |         |
| GEM_with_Frag=3                                        | 55,895     | 109,882    | 145,283    | 219,748    | 172,215    | 322,728    | 239,076    | 184,496    | 363,299    | 97,114     | 488,682    |         |
| GEM_with_Frag=4                                        | 9,078      | 23,185     | 34,360     | 56,084     | 42,740     | 84,639     | 60,090     | 43,415     | 96,960     | 22,565     | 119,319    |         |
| GEM_with_Frag=5                                        | 2,222      | 6,630      | 10,230     | 18,052     | 13,413     | 26,072     | 18,461     | 12,864     | 30,163     | 7,850      | 32,645     |         |
| GEM_with_Frag=6                                        | 851        | 2,286      | 3,805      | 6,770      | 5,138      | 9,502      | 6,721      | 4,680      | 10,949     | 3,494      | 10,364     |         |
| GEM_with_Frag=7                                        | 472        | 1,077      | 1,737      | 3,164      | 2,482      | 4,110      | 3,010      | 2,034      | 4,748      | 1,581      | 3,784      |         |
| GEM_with_Frag=8                                        | 259        | 539        | 939        | 1,682      | 1,388      | 2,059      | 1,615      | 1,038      | 2,395      | 849        | 1,747      |         |
| GEM_with_Frag=9                                        | 193        | 333        | 534        | 1,032      | 766        | 1,162      | 908        | 618        | 1,309      | 541        | 985        |         |
| GEM_with_Frag=10                                       | 128        | 182        | 390        | 639        | 517        | 698        | 589        | 387        | 810        | 284        | 509        |         |
| GEM_with_Frag=11                                       | 67         | 126        | 265        | 415        | 346        | 470        | 405        | 216        | 486        | 184        | 376        |         |
| GEM_with_Frag=12                                       | 57         | 108        | 157        | 265        | 243        | 300        | 308        | 194        | 353        | 107        | 229        |         |
| GEM_with_Frag=13                                       | 52         | 70         | 128        | 196        | 187        | 240        | 187        | 119        | 212        | 96         | 177        |         |
| GEM_with_Frag=14                                       | 39         | 47         | 91         | 168        | 129        | 155        | 162        | 88         | 157        | 46         | 120        |         |
| GEM_with_Frag=15~19                                    | 79         | 90         | 225        | 358        | 291        | 412        | 364        | 197        | 344        | 123        | 243        |         |
| GEM_with_Frag=20~29                                    | 25         | 42         | 88         | 150        | 137        | 164        | 163        | 84         | 88         | 33         | 164        |         |
| GEM_with_Frag=30~39                                    | 11         | 2          | 5          | 14         | 12         | 28         | 28         | 13         | 2          | 5          | 45         |         |
| GEM_with_Frag=40~49                                    | 1          | 1          | 0          | 0          | 2          | 5          | 1          | 2          | 2          | 1          | 12         |         |
| GEM_with_Frag=50~99                                    | 1          | 0          | 1          | 0          | 1          | 3          | 0          | 0          | 0          | 0          | 8          |         |
| GEM_with_Frag=100~199                                  | 0          | 0          | 0          | 0          | 0          | 0          | 0          | 0          | 0          | 0          | 0          |         |
| GEM_with_Frag=200~499                                  | 0          | 0          | 0          | 0          | 0          | 0          | 0          | 0          | 0          | 0          | 0          |         |
| GEM_with_Frag=500~999                                  | 0          | 0          | 0          | 0          | 0          | 0          | 0          | 0          | 0          | 0          | 0          |         |
| GEM_with_Frag>=1000                                    | 0          | 0          | 0          | 0          | 0          | 0          | 0          | 0          | 0          | 0          | 0          |         |
| GEM_with_Frag>=2                                       | 520,952    | 791,544    | 964,667    | 1,341,844  | 1,103,947  | 1,838,463  | 1,439,764  | 1,188,792  | 2,018,968  | 733,738    | 2,750,133  |         |

| GM12878    | GM12878    | GM12878    | GM12878    | GM12878    | GM12878    | GM12878    | GM12878    | GM12878    | GM12878     | GM12878     | GM12878    | GM12878     | GM12878     |
|------------|------------|------------|------------|------------|------------|------------|------------|------------|-------------|-------------|------------|-------------|-------------|
| CTCF       | CTCF       | CTCF       | CTCF       | CTCF       | CTCF       | CTCF       | RAD21      | RAD21      | RAD21       | RAD21       | RAD21      | RAD21       | RAD21       |
| SHG8065    | SHG8098    | SHG8099    | SHG8113    | SHG8117    | SHG8132    | SHG8133    | SHG0180    | SHG0181    | SHG0195     | SHG0196     | SHG0198    | SHG0199     | SHG0202     |
| hg38       | hg38       | hg38       | hg38       | hg38       | hg38       | hg38       | hg38       | hg38       | hg38        | hg38        | hg38       | hg38        | hg38        |
| 0.02039344 | 0.01942816 | 0.01845405 | 0.02347501 | 0.02144112 | 0.0490809  | 0.06331885 | 0.04587731 | 0.0423211  | 0.07546764  | 0.06999088  | 0.02459719 | 0.04832803  | 0.06393175  |
| 69,463,568 | 64,024,493 | 63,853,377 | 89,647,949 | 89,781,816 | 59,679,168 | 77,645,469 | 86,737,328 | 84,530,899 | 156,888,671 | 156,415,452 | 56,143,013 | 102,445,657 | 185,966,786 |
| 42,913,924 | 41,494,304 | 38,705,371 | 68,003,364 | 59,499,825 | 45,518,623 | 56,416,833 | 81,245,068 | 79,961,732 | 145,105,015 | 146,085,990 | 53,219,658 | 96,778,952  | 174,291,034 |
| 39,628,989 | 39,246,156 | 36,291,400 | 65,265,888 | 56,746,979 | 44,097,839 | 54,504,978 | 77,257,629 | 76,226,127 | 137,567,545 | 139,079,600 | 51,039,139 | 92,936,861  | 166,767,800 |
| 23,129,640 | 26,565,428 | 23,160,539 | 49,161,136 | 40,069,067 | 34,851,418 | 42,275,084 | 61,759,016 | 61,074,010 | 107,831,916 | 110,441,419 | 41,192,989 | 72,508,767  | 136,516,711 |
| 21,664,710 | 25,101,266 | 21,702,443 | 47,035,308 | 37,995,117 | 34,018,551 | 41,136,175 | 59,549,310 | 58,978,852 | 103,697,647 | 106,442,199 | 39,859,302 | 70,336,480  | 131,809,441 |
| 21,415,272 | 24,880,328 | 21,492,394 | 46,471,646 | 37,529,466 | 33,664,036 | 40,720,911 | 59,256,727 | 58,715,139 | 103,054,513 | 105,909,846 | 39,694,561 | 69,945,102  | 131,148,769 |
| 21,415,272 | 24,880,328 | 21,492,394 | 46,471,646 | 37,529,466 | 33,664,036 | 40,720,911 | 59,256,727 | 58,715,139 | 103,054,513 | 105,909,846 | 39,694,561 | 69,945,102  | 131,148,769 |
| 1,870,026  | 1,908,267  | 1,816,956  | 2,153,502  | 2,180,138  | 1,900,443  | 1,907,343  | 2,038,467  | 2,037,963  | 2,724,084   | 2,683,085   | 1,890,494  | 2,210,317   | 2,921,118   |
| 1,846,019  | 1,892,738  | 1,799,767  | 2,137,020  | 2,165,412  | 1,894,014  | 1,899,338  | 2,017,770  | 2,017,626  | 2,701,969   | 2,661,243   | 1,875,073  | 2,183,052   | 2,889,612   |
| 1,650,217  | 1,753,372  | 1,629,261  | 2,007,376  | 2,023,825  | 1,838,423  | 1,832,873  | 1,902,013  | 1,905,534  | 2,562,403   | 2,521,212   | 1,781,341  | 2,009,871   | 2,715,025   |
| 1,650,217  | 1,753,372  | 1,629,261  | 2,007,376  | 2,023,825  | 1,838,423  | 1,832,873  | 1,902,013  | 1,905,534  | 2,562,403   | 2,521,212   | 1,781,341  | 2,009,871   | 2,715,025   |
| 484,442    | 468,648    | 441,258    | 411,650    | 453,143    | 200,641    | 204,899    | 357,600    | 352,028    | 698,983     | 680,411     | 330,641    | 722,801     | 829,390     |
| 1,165,775  | 1,284,724  | 1,188,003  | 1,595,726  | 1,570,682  | 1,637,782  | 1,627,974  | 1,544,413  | 1,553,506  | 1,863,420   | 1,840,801   | 1,450,700  | 1,287,070   | 1,885,635   |
| 22,281     | 20,868     | 23,235     | 7,420      | 16,759     | 4,367      | 3,559      | 3,548      | 3,186      | 15,075      | 13,452      | 2,993      | 9,979       | 15,848      |
| 1,143,494  | 1,263,856  | 1,164,768  | 1,588,306  | 1,553,923  | 1,633,415  | 1,624,415  | 1,540,865  | 1,550,320  | 1,848,345   | 1,827,349   | 1,447,707  | 1,277,091   | 1,869,787   |
| 682,574    | 694,295    | 549,250    | 2,576,166  | 1,469,692  | 3,631,955  | 3,958,720  | 5,110,941  | 5,851,981  | 8,157,585   | 9,213,812   | 3,448,083  | 5,871,594   | 9,361,288   |
| 3,814,982  | 4,327,109  | 3,787,752  | 7,730,734  | 6,187,010  | 8,673,167  | 8,711,157  | 9,732,819  | 10,028,458 | 11,013,824  | 11,094,276  | 8,526,621  | 7,757,077   | 11,157,778  |
| 5,004,279  | 5,510,920  | 4,801,495  | 10,725,970 | 8,126,604  | 12,510,130 | 12,878,335 | 15,204,908 | 16,235,653 | 19,885,467  | 21,001,951  | 12,308,338 | 14,361,451  | 21,364,304  |
| 4,299,424  | 4,795,757  | 4,229,010  | 8,142,384  | 6,640,153  | 8,873,808  | 8,916,056  | 10,090,419 | 10,380,486 | 11,712,807  | 11,774,687  | 8,857,262  | 8,479,878   | 11,987,168  |
| 539,816    | 596,225    | 480,188    | 1,877,831  | 1,148,503  | 2,488,683  | 2,624,917  | 3,439,261  | 3,797,704  | 4,777,764   | 5,170,163   | 2,501,133  | 3,444,020   | 5,245,974   |
| 100,830    | 90,974     | 69,233     | 480,013    | 239,804    | 738,695    | 827,338    | 1,120,698  | 1,325,357  | 1,988,666   | 2,281,151   | 681,673    | 1,441,837   | 2,338,256   |
| 30,937     | 18,531     | 14,548     | 139,186    | 61,630     | 239,827    | 286,280    | 362,041    | 459,430    | 811,731     | 981,888     | 187,276    | 582,009     | 1,005,485   |
| 13,881     | 5,267      | 4,484      | 47,287     | 19,841     | 88,648     | 112,004    | 121,582    | 164,105    | 333,657     | 425,887     | 54,273     | 235,059     | 431,837     |
| 7,539      | 2,041      | 1,904      | 18,838     | 7,863      | 37,086     | 48,652     | 42,413     | 62,006     | 140,874     | 189,997     | 16,858     | 97,222      | 190,166     |
| 4,124      | 941        | 831        | 8,660      | 3,579      | 17,296     | 24,007     | 15,851     | 24,355     | 61,690      | 87,118      | 5,472      | 41,603      | 85,052      |
| 2,467      | 440        | 500        | 4,493      | 2,005      | 9,132      | 12,963     | 6,343      | 10,490     | 28,567      | 41,800      | 2,083      | 18,879      | 39,759      |
| 1,713      | 288        | 276        | 2,588      | 1,101      | 5,388      | 7,730      | 2,631      | 4,844      | 13,266      | 20,665      | 863        | 8,945       | 18,890      |
| 1,118      | 140        | 149        | 1,556      | 650        | 3,365      | 4,907      | 1,218      | 2,351      | 6,562       | 10,742      | 460        | 4,441       | 9,355       |
| 729        | 101        | 96         | 928        | 404        | 2,273      | 3,302      | 703        | 1,297      | 3,351       | 5,921       | 245        | 2,415       | 4,659       |
| 482        | 69         | 70         | 637        | 253        | 1,505      | 2,339      | 419        | 800        | 1,776       | 3,335       | 163        | 1,306       | 2,570       |
| 321        | 34         | 50         | 434        | 185        | 1,032      | 1,653      | 247        | 490        | 1,184       | 2,110       | 112        | 829         | 1,418       |
| 244        | 19         | 23         | 300        | 158        | 794        | 1,228      | 188        | 362        | 693         | 1,411       | 60         | 601         | 822         |
| 480        | 63         | 84         | 606        | 318        | 1,805      | 3,067      | 484        | 887        | 1,503       | 2,770       | 242        | 1,295       | 1,704       |
| 144        | 27         | 39         | 184        | 130        | 666        | 1,407      | 260        | 465        | 886         | 1,548       | 125        | 775         | 816         |
| 17         | 3          | 5          | 38         | 21         | 100        | 294        | 83         | 117        | 280         | 417         | 27         | 201         | 208         |
| 8          | 0          | 3          | 5          | 5          | 18         | 86         | 30         | 60         | 105         | 148         | 6          | 68          | 87          |
| 5          | 0          | 2          | 2          | 1          | 9          | 86         | 36         | 47         | 101         | 170         | 5          | 64          | 70          |
| 0          | 0          | 0          | 0          | 0          | 0          | 15         | 1          | 0          | 4           | 22          | 0          | 3           | 8           |
| 0          | 0          | 0          | 0          | 0          | 0          | 4          | 0          | 0          | 0           | 1           | 0          | 1           | 0           |
| 0          | 0          | 0          | 0          | 0          | 0          | 0          | 0          | 0          | 0           | 0           | 0          | 0           | 0           |
| 0          | 0          | 0          | 0          | 0          | 0          | 0          | 0          | 0          | 0           | 0           | 0          | 0           | 0           |
| 704,855    | 715,163    | 572,485    | 2,583,586  | 1,486,451  | 3,636,322  | 3,962,279  | 5,114,489  | 5,855,167  | 8,172,660   | 9,227,264   | 3,451,076  | 5,881,573   | 9,377,136   |

| GM12878     | GM12878     | GM12878     | GM12878    | GM12878    | GM12878    | GM12878    | GM12878     | GM12878     | GM12878    | GM12878    | GM12878     | GM12878    | GM12878    |        |
|-------------|-------------|-------------|------------|------------|------------|------------|-------------|-------------|------------|------------|-------------|------------|------------|--------|
| RAD21       | RAD21       | RAD21       | RAD21      | RAD21      | RAD21      | SMC1A      | SMC1A       | SMC1A       | SMC1A      | SMC1A      | SMC1A       | SMC1A      | RNAPII     | RNAPII |
| SHG0203     | SHG0205     | SHG0206     | SHG0207    | SHG0208    | SHG0209    | SHG0182    | SHG0186     | SHG0197     | SHG0200    | SHG0201    | SHG0204     | SHG0218    | SHG0219    |        |
| hg38        | hg38        | hg38        | hg38       | hg38       | hg38       | hg38       | hg38        | hg38        | hg38       | hg38       | hg38        | hg38       | hg38       |        |
| 0.06507599  | 0.04080005  | 0.05103529  | 0.0272089  | 0.02739122 | 0.02925437 | 0.03681377 | 0.05813272  | 0.04303481  | 0.02459852 | 0.02701237 | 0.03288814  | 0.02927647 | 0.02712616 |        |
| 191,895,737 | 130,723,974 | 162,624,186 | 62,793,728 | 68,451,827 | 79,128,174 | 88,752,922 | 147,848,455 | 149,720,829 | 58,803,883 | 57,751,339 | 177,247,438 | 57,701,716 | 57,662,440 |        |
| 181,580,861 | 123,784,145 | 153,072,139 | 59,211,581 | 64,680,345 | 74,251,010 | 86,265,518 | 139,345,536 | 144,916,276 | 56,903,448 | 54,925,050 | 173,467,548 | 47,703,440 | 47,582,400 |        |
| 174,244,222 | 118,072,681 | 145,811,190 | 56,587,584 | 61,714,453 | 70,710,360 | 83,689,009 | 133,177,422 | 140,949,358 | 55,412,659 | 52,788,350 | 169,298,401 | 44,780,648 | 44,727,208 |        |
| 142,866,662 | 97,255,562  | 119,664,193 | 46,028,720 | 49,078,393 | 55,920,819 | 70,352,994 | 103,749,435 | 118,986,672 | 46,604,769 | 42,174,020 | 147,103,752 | 31,953,228 | 32,058,056 |        |
| 138,316,876 | 93,862,760  | 115,339,163 | 44,521,320 | 47,427,796 | 53,963,819 | 68,703,503 | 100,205,515 | 116,115,293 | 45,681,378 | 40,943,087 | 144,187,673 | 30,478,266 | 30,510,648 |        |
| 137,637,355 | 93,454,012  | 114,829,001 | 44,331,077 | 47,222,452 | 53,726,175 | 67,918,010 | 98,814,463  | 114,538,527 | 44,911,203 | 40,483,176 | 142,558,840 | 30,299,353 | 30,347,279 |        |
| 137,637,355 | 93,454,012  | 114,829,001 | 44,331,077 | 47,222,452 | 53,726,175 | 67,918,010 | 98,814,463  | 114,538,527 | 44,911,203 | 40,483,176 | 142,558,840 | 30,299,353 | 30,347,279 |        |
| 2,800,485   | 2,618,896   | 2,798,679   | 2,204,312  | 2,095,451  | 2,178,202  | 1,914,369  | 2,532,457   | 2,298,015   | 1,825,199  | 2,076,666  | 2,446,515   | 2,029,433  | 2,016,268  |        |
| 2,769,385   | 2,586,966   | 2,764,032   | 2,180,309  | 2,075,332  | 2,156,250  | 1,897,061  | 2,507,478   | 2,278,233   | 1,803,937  | 2,053,586  | 2,419,741   | 1,999,990  | 1,990,892  |        |
| 2,593,084   | 2,424,384   | 2,586,355   | 2,049,577  | 1,954,728  | 2,024,006  | 1,799,976  | 2,368,735   | 2,147,125   | 1,681,152  | 1,914,466  | 2,283,339   | 1,780,041  | 1,793,040  |        |
| 2,593,084   | 2,424,384   | 2,586,355   | 2,049,577  | 1,954,728  | 2,024,006  | 1,799,976  | 2,368,735   | 2,147,125   | 1,681,152  | 1,914,466  | 2,283,339   | 1,780,041  | 1,793,040  |        |
| 801,145     | 722,533     | 802,303     | 511,059    | 442,773    | 489,157    | 286,266    | 681,109     | 527,349     | 461,177    | 489,631    | 651,260     | 423,117    | 386,400    |        |
| 1,791,939   | 1,701,851   | 1,784,052   | 1,538,518  | 1,511,955  | 1,534,849  | 1,513,710  | 1,687,626   | 1,619,776   | 1,219,975  | 1,424,835  | 1,632,079   | 1,356,924  | 1,406,640  |        |
| 13,357      | 10,142      | 13,514      | 4,943      | 4,025      | 4,763      | 2,303      | 12,606      | 6,264       | 4,466      | 4,987      | 7,318       | 9,443      | 8,927      |        |
| 1,778,582   | 1,691,709   | 1,770,538   | 1,533,575  | 1,507,930  | 1,530,086  | 1,511,407  | 1,675,020   | 1,613,512   | 1,215,509  | 1,419,848  | 1,624,761   | 1,347,481  | 1,397,713  |        |
| 11,244,395  | 8,058,925   | 8,778,655   | 4,373,713  | 4,527,189  | 4,803,930  | 6,605,440  | 7,001,774   | 9,000,582   | 4,229,117  | 3,867,039  | 12,680,709  | 1,339,159  | 1,393,601  |        |
| 10,719,823  | 10,725,236  | 10,900,905  | 9,312,672  | 9,306,439  | 9,463,101  | 9,998,098  | 10,146,056  | 10,501,513  | 7,495,830  | 8,484,451  | 10,047,768  | 5,874,233  | 6,132,695  |        |
| 22,778,720  | 19,516,836  | 20,495,377  | 14,202,387 | 14,280,426 | 14,760,951 | 16,892,107 | 17,841,545  | 20,035,708  | 12,190,590 | 12,846,108 | 23,387,055  | 7,645,952  | 7,921,623  |        |
| 11,520,968  | 11,447,769  | 11,703,208  | 9,823,731  | 9,749,212  | 9,952,258  | 10,284,364 | 10,827,165  | 11,028,862  | 7,957,007  | 8,974,082  | 10,699,028  | 6,297,350  | 6,519,095  |        |
| 5,750,646   | 4,784,628   | 5,044,682   | 3,031,457  | 3,108,659  | 3,253,199  | 4,131,383  | 4,219,834   | 5,086,835   | 2,771,706  | 2,689,145  | 6,011,352   | 1,082,922  | 1,133,230  |        |
| 2,867,529   | 1,965,856   | 2,176,272   | 921,848    | 965,732    | 1,040,253  | 1,552,406  | 1,671,613   | 2,243,498   | 959,255    | 805,678    | 3,266,537   | 203,713    | 210,465    |        |
| 1,365,339   | 780,487     | 904,026     | 281,993    | 301,119    | 334,272    | 569,593    | 651,896     | 951,453     | 325,462    | 243,671    | 1,677,510   | 43,385     | 43,139     |        |
| 645,462     | 311,856     | 375,594     | 90,150     | 97,829     | 112,114    | 212,440    | 259,580     | 402,540     | 111,611    | 78,484     | 842,856     | 10,920     | 10,375     |        |
| 309,354     | 127,301     | 159,676     | 31,110     | 33,625     | 39,664     | 82,078     | 108,115     | 174,149     | 39,484     | 27,927     | 424,815     | 3,477      | 2,979      |        |
| 151,595     | 53,681      | 69,720      | 11,428     | 12,661     | 15,136     | 32,493     | 47,852      | 77,277      | 14,561     | 11,182     | 217,430     | 1,560      | 1,064      |        |
| 75,924      | 23,233      | 31,503      | 4,724      | 5,308      | 6,318      | 13,358     | 22,503      | 35,604      | 5,738      | 5,238      | 113,577     | 864        | 526        |        |
| 39,534      | 10,665      | 14,590      | 2,172      | 2,317      | 2,949      | 5,914      | 11,339      | 16,578      | 2,460      | 2,843      | 59,815      | 485        | 238        |        |
| 21,228      | 4,983       | 6,946       | 1,171      | 1,232      | 1,479      | 2,888      | 6,179       | 7,996       | 1,140      | 1,741      | 32,040      | 328        | 150        |        |
| 11,468      | 2,449       | 3,518       | 674        | 741        | 871        | 1,513      | 3,683       | 3,979       | 596        | 1,280      | 17,544      | 218        | 111        |        |
| 6,457       | 1,371       | 1,855       | 422        | 443        | 524        | 827        | 2,359       | 2,198       | 342        | 832        | 9,580       | 155        | 65         |        |
| 3,863       | 718         | 1,011       | 278        | 334        | 364        | 529        | 1,598       | 1,211       | 222        | 561        | 5,454       | 139        | 45         |        |
| 2,372       | 434         | 612         | 217        | 200        | 284        | 389        | 1,227       | 754         | 151        | 520        | 3,048       | 103        | 40         |        |
| 4,324       | 823         | 1,191       | 562        | 573        | 741        | 949        | 3,225       | 1,475       | 435        | 1,429      | 4,496       | 245        | 73         |        |
| 1,770       | 405         | 669         | 291        | 329        | 352        | 629        | 2,066       | 797         | 268        | 946        | 1,237       | 78         | 25         |        |
| 496         | 106         | 183         | 82         | 71         | 96         | 189        | 658         | 257         | 74         | 307        | 368         | 9          | 2          |        |
| 179         | 32          | 57          | 46         | 24         | 45         | 78         | 273         | 111         | 38         | 124        | 163         | 1          | 0          |        |
| 200         | 38          | 57          | 29         | 14         | 31         | 80         | 338         | 120         | 39         | 107        | 187         | 0          | 1          |        |
| 12          | 1           | 7           | 2          | 1          | 1          | 7          | 37          | 14          | 1          | 11         | 17          | 0          | 0          |        |
| 0           | 0           | 0           | 0          | 0          | 0          | 0          | 0           | 5           | 0          | 0          | 0           | 1          | 0          |        |
| 0           | 0           | 0           | 0          | 0          | 0          | 0          | 0           | 0           | 0          | 0          | 0           | 0          | 0          |        |
| 0           | 0           | 0           | 0          | 0          | 0          | 0          | 0           | 0           | 0          | 0          | 0           | 0          | 0          |        |
| 11,257,752  | 8,069,067   | 8,792,169   | 4,378,656  | 4,531,214  | 4,808,693  | 6,607,743  | 7,014,380   | 9,006,846   | 4,233,583  | 3,872,026  | 12,688,027  | 1,348,602  | 1,402,528  |        |

| GM12878    | GM12878    | GM12878    | GM12878    | GM12878    | GM12878    | GM12878    | GM12878    | GM12878    | GM12878    | GM12878    | GM12878    | GM12878    |
|------------|------------|------------|------------|------------|------------|------------|------------|------------|------------|------------|------------|------------|
| RNAPII     | RNAPII     | RNAPII     | RNAPII     | RNAPII     | RNAPII     | RNAPII     | RNAPII     | RNAPII     | RNAPII     | RNAPII     | RNAPII     | RNAPII     |
| SHG0234    | SHG0235    | SHG0238    | SHG0239    | SHG8034    | SHG8096    | SHG8097    | SHG8100    | SHG8101    | SHG8112    | SHG8116    | SHG8130    | SHG8131    |
| hg38       | hg38       | hg38       | hg38       | hg38       | hg38       | hg38       | hg38       | hg38       | hg38       | hg38       | hg38       | hg38       |
| 0.21233489 | 0.09380037 | 0.03209397 | 0.03319454 | 0.04271081 | 0.01937799 | 0.01926378 | 0.02247902 | 0.02052824 | 0.02017425 | 0.01793076 | 0.08709192 | 0.02821182 |
| 77,820,387 | 87,702,678 | 78,539,454 | 94,222,395 | 79,192,522 | 68,385,904 | 64,871,999 | 65,226,738 | 67,282,542 | 67,273,144 | 63,420,334 | 73,720,406 | 50,726,668 |
| 50,406,922 | 73,653,661 | 56,537,054 | 82,232,378 | 68,262,493 | 50,175,704 | 47,443,932 | 52,747,901 | 53,873,955 | 43,251,628 | 48,269,836 | 43,468,577 | 42,842,355 |
| 44,300,995 | 69,032,368 | 50,387,088 | 76,485,957 | 66,347,013 | 47,711,991 | 45,001,883 | 50,980,222 | 52,140,432 | 40,793,699 | 46,152,768 | 41,309,867 | 41,623,219 |
| 26,780,319 | 51,781,798 | 33,117,989 | 56,874,367 | 49,364,758 | 33,548,953 | 31,233,688 | 38,038,027 | 38,882,339 | 27,541,504 | 33,217,001 | 28,287,609 | 33,408,065 |
| 25,194,475 | 50,269,960 | 30,999,765 | 54,237,090 | 47,724,151 | 31,974,403 | 29,745,078 | 36,582,179 | 37,397,417 | 26,029,743 | 31,846,649 | 27,064,622 | 32,719,472 |
| 25,004,909 | 49,825,903 | 30,813,074 | 53,910,606 | 46,973,678 | 31,703,645 | 29,462,112 | 36,108,371 | 36,929,116 | 25,851,751 | 31,564,400 | 26,888,040 | 32,442,144 |
| 25,004,909 | 49,825,903 | 30,813,074 | 53,910,606 | 46,973,678 | 31,703,645 | 29,462,112 | 36,108,371 | 36,929,116 | 25,851,751 | 31,564,400 | 26,888,040 | 32,442,144 |
| 1,703,798  | 1,775,014  | 1,848,488  | 1,939,444  | 2,452,263  | 2,062,823  | 2,034,704  | 2,081,179  | 2,097,364  | 2,041,353  | 2,149,215  | 1,859,947  | 1,891,863  |
| 1,680,412  | 1,756,762  | 1,813,751  | 1,918,177  | 2,437,392  | 2,047,941  | 2,018,528  | 2,067,835  | 2,083,171  | 2,024,895  | 2,135,846  | 1,851,848  | 1,885,027  |
| 1,580,754  | 1,686,054  | 1,675,995  | 1,835,682  | 2,314,739  | 1,926,369  | 1,895,109  | 1,955,121  | 1,967,698  | 1,869,092  | 2,024,244  | 1,745,892  | 1,830,041  |
| 1,580,754  | 1,686,054  | 1,675,995  | 1,835,682  | 2,314,739  | 1,926,369  | 1,895,109  | 1,955,121  | 1,967,698  | 1,869,092  | 2,024,244  | 1,745,892  | 1,830,041  |
| 166,446    | 194,016    | 493,995    | 302,266    | 567,018    | 440,587    | 449,117    | 423,954    | 422,838    | 582,133    | 458,197    | 273,006    | 214,615    |
| 1,414,308  | 1,492,038  | 1,182,000  | 1,533,416  | 1,747,721  | 1,485,782  | 1,445,992  | 1,531,167  | 1,544,860  | 1,286,959  | 1,566,047  | 1,472,886  | 1,615,426  |
| 5,445      | 1,287      | 19,317     | 4,442      | 12,300     | 14,140     | 14,834     | 7,348      | 8,202      | 34,006     | 13,431     | 22,271     | 7,246      |
| 1,408,863  | 1,490,751  | 1,162,683  | 1,528,974  | 1,735,421  | 1,471,642  | 1,431,158  | 1,523,819  | 1,536,658  | 1,252,953  | 1,552,616  | 1,450,615  | 1,608,180  |
| 1,778,231  | 6,464,631  | 598,124    | 2,915,214  | 3,137,355  | 1,460,923  | 1,330,372  | 2,027,957  | 1,905,002  | 803,526    | 2,027,444  | 1,492,933  | 3,730,334  |
| 6,740,246  | 9,988,324  | 3,982,750  | 8,286,229  | 9,100,378  | 5,979,925  | 5,699,881  | 7,482,459  | 7,384,740  | 3,937,064  | 6,719,699  | 5,333,231  | 8,037,165  |
| 8,690,368  | 16,648,258 | 5,094,186  | 11,508,151 | 12,817,051 | 7,895,575  | 7,494,204  | 9,941,718  | 9,720,782  | 5,356,729  | 9,218,771  | 7,121,441  | 11,989,360 |
| 6,906,692  | 10,182,340 | 4,476,745  | 8,588,495  | 9,667,396  | 6,420,512  | 6,148,998  | 7,906,413  | 7,807,578  | 4,519,197  | 7,177,896  | 5,606,237  | 8,251,780  |
| 1,406,525  | 4,064,813  | 518,712    | 2,162,174  | 2,345,004  | 1,142,105  | 1,047,046  | 1,608,528  | 1,528,077  | 620,802    | 1,486,381  | 1,052,892  | 2,380,711  |
| 288,125    | 1,503,526  | 75,534     | 547,781    | 585,238    | 241,416    | 215,447    | 329,991    | 301,054    | 136,630    | 372,625    | 271,127    | 788,108    |
| 63,807     | 548,586    | 15,081     | 145,910    | 151,866    | 61,145     | 54,127     | 70,879     | 62,083     | 43,183     | 110,550    | 93,479     | 296,334    |
| 16,507     | 207,350    | 4,317      | 41,665     | 42,965     | 18,566     | 16,747     | 17,023     | 14,649     | 17,369     | 38,885     | 40,615     | 125,817    |
| 4,968      | 81,518     | 1,707      | 13,256     | 13,617     | 6,525      | 6,243      | 4,835      | 4,148      | 8,087      | 15,977     | 20,555     | 60,073     |
| 1,872      | 33,076     | 789        | 4,677      | 5,189      | 2,591      | 2,636      | 1,751      | 1,436      | 4,249      | 7,230      | 11,660     | 31,777     |
| 788        | 13,925     | 423        | 1,935      | 2,292      | 1,171      | 1,221      | 781        | 657        | 2,432      | 3,633      | 7,306      | 18,283     |
| 442        | 6,291      | 278        | 884        | 1,179      | 643        | 657        | 414        | 374        | 1,523      | 1,970      | 4,664      | 11,104     |
| 226        | 2,975      | 185        | 476        | 668        | 312        | 371        | 282        | 223        | 990        | 1,191      | 3,192      | 7,195      |
| 123        | 1,575      | 106        | 251        | 434        | 194        | 231        | 162        | 132        | 606        | 741        | 2,287      | 4,770      |
| 93         | 839        | 91         | 180        | 277        | 123        | 139        | 134        | 76         | 460        | 478        | 1,641      | 3,374      |
| 56         | 473        | 57         | 109        | 196        | 73         | 82         | 98         | 73         | 311        | 301        | 1,206      | 2,361      |
| 32         | 275        | 33         | 77         | 151        | 48         | 69         | 52         | 39         | 192        | 204        | 957        | 1,676      |
| 81         | 511        | 84         | 178        | 299        | 91         | 118        | 204        | 100        | 504        | 448        | 2,301      | 3,989      |
| 27         | 137        | 42         | 84         | 208        | 47         | 59         | 115        | 60         | 165        | 207        | 1,093      | 1,631      |
| 2          | 33         | 2          | 15         | 45         | 8          | 10         | 36         | 12         | 23         | 35         | 178        | 259        |
| 2          | 5          | 0          | 2          | 17         | 5          | 2          | 14         | 9          | 4          | 12         | 38         | 77         |
| 0          | 10         | 0          | 2          | 10         | 0          | 1          | 6          | 2          | 2          | 7          | 13         | 39         |
| 0          | 0          | 0          | 0          | 0          | 0          | 0          | 0          | 0          | 0          | 0          | 0          | 2          |
| 0          | 0          | 0          | 0          | 0          | 0          | 0          | 0          | 0          | 0          | 0          | 0          | 0          |
| 0          | 0          | 0          | 0          | 0          | 0          | 0          | 0          | 0          | 0          | 0          | 0          | 0          |
| 0          | 0          | 0          | 0          | 0          | 0          | 0          | 0          | 0          | 0          | 0          | 0          | 0          |
| 1,783,676  | 6,465,918  | 617,441    | 2,919,656  | 3,149,655  | 1,475,063  | 1,345,206  | 2,035,305  | 1,913,204  | 837,532    | 2,040,875  | 1,515,204  | 3,737,580  |



| Library_ID                      | LHG0052H    | LHG0051H  | LHG0104V    | LHG0051H_0104V | LHG0035N_0035V | LHH0118V    | LHH0127V    |
|---------------------------------|-------------|-----------|-------------|----------------|----------------|-------------|-------------|
| Library_type                    | hiseq       | hiseq     | novaseq     | pooled         | pooled         | novaseq     | novaseq     |
| Reference_genome                | hg38        | hg38      | hg38        | hg38           | hg38           | hg38        | hg38        |
| Cell_type                       | GM12878     | GM12878   | GM12878     | GM12878        | GM12878        | HCT116      | HCT116      |
| Factor                          | CTCF        | SMC1A     | RAD21       | Cohesin        | RNAPII         | CTCF        | CTCF        |
| Total_read_pairs                | 358,752,218 | 356152208 | 459,140,632 | 815,292,840    | 879,867,506    | 293,527,935 | 306,988,032 |
| Read_pairs_with_linker          | 328,927,665 | 327803209 | 322,463,454 | 650,266,663    | 805,998,749    | 209,379,373 | 278,017,188 |
| Fraction_read_pairs_with_linker | 0.92        | 0.92      | 0.7         | 0.8            | 0.92           | 0.71        | 0.91        |
| One_tag                         | 91,116,895  | 92611052  | 121,729,821 | 214,340,873    | 305,223,593    | 67,711,510  | 90,202,553  |
| PET                             | 228,074,463 | 225677969 | 184,468,375 | 410,146,344    | 468,121,770    | 137,694,970 | 178,342,047 |
| Uniquely_mapped_PET             | 179,600,076 | 179509164 | 147,434,776 | 326,943,940    | 359,389,378    | 101,683,183 | 139,475,184 |
| Non-redundant_PET               | 106,110,023 | 112913401 | 67,917,076  | 180,798,216    | 58,636,573     | 14,691,093  | 58,699,205  |
| Redundancy                      | 0.41        | 0.37      | 0.54        | 0.45           | 0.84           | 0.86        | 0.58        |
| Non-redundant_tag               | 362,869,381 | 362795441 | 379860551   | 736,311,882    | 269,106,487    | 86007544    | 214963074   |
| Peak                            | 28,992      | 19659     | 39,082      | 29,119         | 50,232         | 72,052      | 355,784     |
| Self-ligation_PET               | 36,374,046  | 40192551  | 40,718,911  | 80,880,097     | 30,016,547     | 7,646,260   | 44,574,688  |
| Inter-ligation_PET              | 69,735,977  | 72720850  | 27,198,165  | 99,918,119     | 28,620,026     | 7,044,833   | 14,124,517  |
| Intra-chr_PET                   | 53,879,279  | 57355817  | 24,463,289  | 81,818,234     | 22,888,857     | 5,371,336   | 12,558,160  |
| Inter-chr_PET                   | 15,856,698  | 15365033  | 2,734,876   | 18,099,885     | 5,731,169      | 1,673,497   | 1,566,357   |
| ratio_of_intra/inter_PET        | 3.4         | 3.73      | 8.94        | 4.52           | 3.99           | 3.21        | 8.02        |
| Singleton                       | 54,239,711  | 57277746  | 20,413,204  | 72,885,936     | 19,742,331     | 5,489,032   | 11,124,088  |
| Intra-chr_singleton             | 39,945,853  | 43361447  | 17,896,022  | 56,461,791     | 15,187,368     | 4,060,994   | 9,635,525   |
| Inter-chr_singleton             | 14,293,858  | 13916299  | 2,517,182   | 16,424,145     | 4,554,963      | 1,428,038   | 1,488,563   |
| PET_cluster                     | 5,231,012   | 5487852   | 2,055,333   | 7,913,116      | 2,840,108      | 590,202     | 920,945     |
| ratio_of_intra/inter_cluster    | 6.25        | 7.02      | 19.32       | 9.02           | 5.15           | 4.62        | 24.8        |
| Intra-chr_PET_cluster           | 4,509,611   | 4803284   | 1,954,185   | 7,123,625      | 2,378,076      | 485,091     | 885,250     |
| pets_number_2                   | 3,328,184   | 3639546   | 1,401,063   | 5,104,152      | 1,581,827      | 358,928     | 608,866     |
| pets_number_3                   | 653,815     | 669744    | 282,716     | 1,057,262      | 395,541        | 68,675      | 133,453     |
| pets_number_4                   | 215,205     | 209719    | 101,668     | 367,194        | 159,917        | 24,637      | 51,355      |
| pets_number_5                   | 95,704      | 90839     | 47,834      | 171,135        | 81,272         | 11,965      | 26,092      |
| pets_number_6                   | 51,669      | 48183     | 26,767      | 96,803         | 47,435         | 6,490       | 15,256      |
| pets_number_7                   | 32,366      | 29546     | 17,124      | 60,673         | 30,227         | 3,797       | 10,002      |
| pets_number_8                   | 21,928      | 20090     | 11,760      | 41,862         | 19,361         | 2,524       | 6,993       |
| pets_number_9                   | 15,747      | 14331     | 8,686       | 30,342         | 12,970         | 1,655       | 5,190       |
| pets_number_10                  | 12,021      | 10657     | 6,672       | 23,162         | 8,993          | 1,275       | 3,921       |
| pets_number>10                  | 82,972      | 70629     | 49,895      | 171,040        | 40,533         | 5,145       | 24,122      |
| Inter-chr_PET_cluster           | 721,401     | 684568    | 101,148     | 789,491        | 462,032        | 105,111     | 35,695      |
| pets_number_2                   | 631,456     | 618023    | 89,814      | 710,643        | 338,328        | 86,076      | 31,230      |
| pets_number_3                   | 70,736      | 56398     | 8,625       | 65,653         | 68,613         | 11,466      | 3,275       |
| pets_number_4                   | 13,491      | 8181      | 1,956       | 10,365         | 25,405         | 3,897       | 788         |
| pets_number_5                   | 3,492       | 1498      | 528         | 2,083          | 12,313         | 1,662       | 254         |
| pets_number_6                   | 1,165       | 316       | 153         | 502            | 6,815          | 852         | 97          |
| pets_number_7                   | 447         | 92        | 39          | 140            | 4,210          | 464         | 19          |
| pets_number_8                   | 221         | 30        | 11          | 52             | 2,549          | 272         | 14          |
| pets_number_9                   | 169         | 7         | 6           | 12             | 1,541          | 146         | 5           |
| pets_number_10                  | 81          | 8         | 3           | 8              | 970            | 115         | 2           |
| pets_number>10                  | 143         | 15        | 13          | 33             | 1,288          | 161         | 11          |
| intra_pets_number>2             | 1,181,427   | 1,163,738 | 553,122     | 2,019,473      | 796,249        | 126,163     | 276,384     |

| LHH0118V_0  | LHH0098V  | LHH0128V    | LHH0098V_0  | LHH0139    | LHH0139V   | LHH0140    | LHH0140V    | LHH0139_01  | LHH0146V     | LHH0147V     |
|-------------|-----------|-------------|-------------|------------|------------|------------|-------------|-------------|--------------|--------------|
| pooled      | novaseq   | novaseq     | pooled      | qcseq      | hiseq      | qcseq      | hiseq       | pooled      | novaseq      | novaseq      |
| hg38        | hg38      | hg38        | hg38        | hg38       | hg38       | hg38       | hg38        | hg38        | hg38         | hg38         |
| HCT116-wt   | HCT116    | HCT116      | HCT116-wt   | HCT116-RAD | HCT116-wt  | HCT116-RAD | HCT116-wt   | HCT116-wt   | HCT116-mAC   | HCT116-mAC   |
| CTCF        | RNAPII    | RNAPII      | RNAPII      | RAD21      | RAD21      | RAD21      | RAD21       | RAD21       | none-likehic | none-likehic |
| 600,515,967 | 517207217 | 316,087,217 | 833,294,434 | 48,523,665 | 90,562,053 | 42,973,485 | 110,921,989 | 292,981,192 | 360,397,636  | 372,697,334  |
| 487,396,561 | 451545618 | 272,698,811 | 724,244,429 | 40,331,721 | 75,028,257 | 36,548,964 | 93,886,130  | 245,795,072 | 332,763,506  | 328,476,305  |
| 0.81        | 0.87      | 0.86        | 0.87        | 0.83       | 0.83       | 0.85       | 0.85        | 0.84        | 0.92         | 0.88         |
| 157,914,063 | 173652631 | 78,399,895  | 252,052,526 | 11,591,968 | 21,789,368 | 10,344,168 | 26,846,543  | 70,572,047  | 102,735,699  | 88,151,514   |
| 316,037,017 | 270237912 | 184,446,325 | 454,684,237 | 27,411,989 | 51,330,793 | 25,034,264 | 64,739,897  | 168,516,943 | 221,734,530  | 231,282,572  |
| 241,158,367 | 177441741 | 148,915,219 | 326,356,960 | 23,001,256 | 43,118,396 | 20,973,285 | 54,221,758  | 141,314,695 | 175,237,861  | 185,042,954  |
| 73,213,214  | 38443824  | 44,042,591  | 82,471,851  | 6,705,673  | 8,345,186  | 7,585,990  | 10,991,359  | 21,572,799  | 106,924,059  | 110,480,076  |
| 0.7         | 0.78      | 0.7         | 0.75        | 0.71       | 0.81       | 0.64       | 0.8         | 0.85        | 0.39         | 0.4          |
| 297905125   | 189630121 | 164602051   | 351858151   | 25860590   | 33247217   | 27716144   | 42054236    | 85527138    | 355115179    | 359906998    |
| 117,603     | 598505    | 390,734     | 117,768     | 51,228     | 59,697     | 49,305     | 64,637      | 87,011      | 177,907      | 141,079      |
| 52,092,777  | 20140372  | 34,897,451  | 55,023,272  | 5,327,600  | 6,615,282  | 6,056,074  | 8,734,119   | 17,099,822  | 70,678,761   | 68,671,890   |
| 21,120,437  | 18303452  | 9,145,140   | 27,448,579  | 1,378,073  | 1,729,904  | 1,529,916  | 2,257,240   | 4,472,977   | 36,245,298   | 41,808,186   |
| 17,889,612  | 14357432  | 7,733,172   | 22,090,597  | 1,248,156  | 1,565,122  | 1,415,930  | 2,080,900   | 4,080,367   | 29,812,795   | 32,436,743   |
| 3,230,825   | 3946020   | 1,411,968   | 5,357,982   | 129,917    | 164,782    | 113,986    | 176,340     | 392,610     | 6,432,503    | 9,371,443    |
| 5.54        | 3.64      | 5.48        | 4.12        | 9.61       | 9.5        | 12.42      | 11.8        | 10.39       | 4.63         | 3.46         |
| 15,771,334  | 15085865  | 7,766,436   | 22,053,300  | 1,167,944  | 1,351,801  | 1,345,956  | 1,792,701   | 3,282,048   | 31,965,122   | 37,613,583   |
| 12,864,812  | 11630363  | 6,454,446   | 17,286,529  | 1,048,582  | 1,210,361  | 1,239,282  | 1,640,644   | 2,953,267   | 25,735,750   | 28,607,251   |
| 2,906,522   | 3455502   | 1,311,990   | 4,766,771   | 119,362    | 141,440    | 106,674    | 152,057     | 328,781     | 6,229,372    | 9,006,332    |
| 1,617,543   | 1335842   | 506,966     | 2,024,843   | 78,635     | 141,066    | 70,779     | 176,097     | 413,910     | 1,699,287    | 1,721,093    |
| 10.46       | 5.11      | 10.42       | 6.69        | 15.86      | 13.1       | 20.55      | 15.97       | 14.65       | 16.46        | 8.82         |
| 1,476,339   | 1117059   | 462,584     | 1,761,433   | 73,972     | 131,060    | 67,495     | 165,719     | 387,454     | 1,601,936    | 1,545,821    |
| 999,042     | 889107    | 349,334     | 1,331,315   | 55,739     | 97,185     | 52,311     | 124,057     | 274,784     | 1,250,091    | 1,236,323    |
| 227,025     | 142431    | 63,563      | 245,926     | 10,140     | 18,636     | 8,945      | 23,394      | 58,207      | 215,147      | 194,839      |
| 89,437      | 43807     | 21,989      | 83,219      | 3,661      | 6,672      | 2,967      | 8,172       | 22,254      | 67,625       | 58,155       |
| 45,656      | 18485     | 9,938       | 37,137      | 1,618      | 3,122      | 1,251      | 3,920       | 10,995      | 28,242       | 23,620       |
| 27,210      | 8805      | 5,225       | 19,304      | 840        | 1,773      | 628        | 2,098       | 6,301       | 14,348       | 11,554       |
| 17,424      | 4724      | 3,016       | 11,074      | 525        | 1,061      | 389        | 1,280       | 3,848       | 8,127        | 6,518        |
| 12,246      | 2752      | 1,965       | 6,987       | 308        | 625        | 250        | 767         | 2,475       | 4,835        | 3,888        |
| 9,012       | 1668      | 1,382       | 4,793       | 234        | 417        | 145        | 479         | 1,778       | 3,279        | 2,621        |
| 6,896       | 1097      | 969         | 3,424       | 158        | 302        | 111        | 328         | 1,236       | 2,275        | 1,826        |
| 42,391      | 4183      | 5,203       | 18,254      | 749        | 1,267      | 498        | 1,224       | 5,576       | 7,967        | 6,477        |
| 141,204     | 218783    | 44,382      | 263,410     | 4,663      | 10,006     | 3,284      | 10,378      | 26,456      | 97,351       | 175,272      |
| 117,616     | 185576    | 37,140      | 222,896     | 3,842      | 8,046      | 2,765      | 8,334       | 20,637      | 90,766       | 163,464      |
| 14,795      | 22164     | 4,910       | 27,108      | 550        | 1,211      | 375        | 1,295       | 3,407       | 5,511        | 9,940        |
| 4,696       | 6386      | 1,464       | 7,866       | 180        | 402        | 96         | 396         | 1,179       | 810          | 1,438        |
| 1,923       | 2557      | 493         | 3,050       | 60         | 198        | 31         | 171         | 579         | 167          | 294          |
| 949         | 1107      | 207         | 1,321       | 22         | 85         | 9          | 93          | 314         | 51           | 74           |
| 492         | 525       | 96          | 621         | 6          | 36         | 5          | 36          | 148         | 15           | 26           |
| 288         | 238       | 29          | 272         | 2          | 15         | 1          | 29          | 79          | 5            | 10           |
| 152         | 112       | 18          | 130         | 0          | 3          | 0          | 12          | 51          | 6            | 4            |
| 120         | 61        | 13          | 73          | 0          | 4          | 1          | 6           | 26          | 4            | 3            |
| 173         | 57        | 12          | 73          | 1          | 6          | 1          | 6           | 36          | 16           | 19           |

|         |         |         |         |        |        |        |        |         |         |         |
|---------|---------|---------|---------|--------|--------|--------|--------|---------|---------|---------|
| 477,297 | 227,952 | 113,250 | 430,118 | 18,233 | 33,875 | 15,184 | 41,662 | 112,670 | 351,845 | 309,498 |
|---------|---------|---------|---------|--------|--------|--------|--------|---------|---------|---------|

| LHH0157     | LHH0172     | LHH0157_01  | LHH0158     | LHH0173     | LHH0158_01  | LHH0170     | LHH0159     | LHH0159V    | LHH0170_0159  | LHH0171     |
|-------------|-------------|-------------|-------------|-------------|-------------|-------------|-------------|-------------|---------------|-------------|
| novaseq     | novaseq     | pooled      | novaseq     | novaseq     | pooled      | novaseq     | novaseq     | novaseq     | pooled        | novaseq     |
| hg38        | hg38        | hg38        | hg38        | hg38        | hg38        | hg38        | hg38        | hg38        | hg38          | hg38        |
| HCT116-RAD  | HCT116-RAD  | HCT116-RAD  | HCT116-RAD  | HCT116-RAD  | HCT116-RAD  | HCT116-RAD  | HCT116-RAD  | HCT116-RAD  | HCT116-RAD21  | HCT116-RAD  |
| CTCF        | CTCF        | CTCF        | CTCF        | CTCF        | CTCF        | RNAPII      | RNAPII      | RNAPII      | RNAPII        | RNAPII      |
| 366,508,457 | 569,205,831 | 935,714,288 | 401,699,562 | 460,564,094 | 862,263,656 | 557,061,917 | 343,180,214 | 483,901,014 | 1,384,143,145 | 565,251,115 |
| 339,696,732 | 527,351,506 | 867,048,238 | 371,666,476 | 425,780,166 | 797,446,642 | 517,998,624 | 320,331,706 | 453,410,923 | 1,291,741,253 | 523,472,548 |
| 0.93        | 0.93        | 0.93        | 0.93        | 0.92        | 0.92        | 0.93        | 0.93        | 0.94        | 0.93          | 0.93        |
| 107,052,736 | 175,480,282 | 282,533,018 | 115,962,944 | 142,223,489 | 258,186,433 | 197,218,539 | 107,125,259 | 152,138,436 | 456,482,234   | 193,704,777 |
| 212,107,094 | 342,780,972 | 554,888,066 | 232,472,432 | 275,740,089 | 508,212,521 | 316,451,293 | 192,719,614 | 269,464,891 | 778,635,798   | 323,895,885 |
| 171,149,739 | 272,626,140 | 443,775,879 | 187,436,945 | 220,538,751 | 407,975,696 | 247,521,404 | 152,353,109 | 213,103,487 | 612,978,000   | 255,007,981 |
| 43,952,826  | 78,684,532  | 122,544,001 | 46,417,943  | 51,541,251  | 97,870,444  | 34,436,532  | 36,654,383  | 39,516,824  | 80,322,705    | 51,158,533  |
| 0.74        | 0.71        | 0.72        | 0.75        | 0.77        | 0.76        | 0.86        | 0.76        | 0.81        | 0.87          | 0.8         |
| 162587502   | 292882828   | 449256959   | 172911962   | 203452802   | 371635392   | 161925339   | 146107485   | 161556435   | 350483376     | 220694073   |
| 110,176     | 127,600     | 131,371     | 106,552     | 122,255     | 127,824     | 109,499     | 108,411     | 112,496     | 129,576       | 122,089     |
| 26,184,726  | 41,874,843  | 67,966,716  | 30,300,253  | 29,878,151  | 60,089,841  | 21,048,717  | 23,672,339  | 25,521,178  | 50,582,246    | 33,260,249  |
| 17,768,100  | 36,809,689  | 54,577,285  | 16,117,690  | 21,663,100  | 37,780,603  | 13,387,815  | 12,982,044  | 13,995,646  | 29,740,459    | 17,898,284  |
| 14,623,852  | 26,969,581  | 41,593,019  | 11,722,636  | 14,413,758  | 26,136,274  | 9,377,270   | 10,254,888  | 11,040,356  | 22,232,867    | 11,803,079  |
| 3,144,248   | 9,840,108   | 12,984,266  | 4,395,054   | 7,249,342   | 11,644,329  | 4,010,545   | 2,727,156   | 2,955,290   | 7,507,592     | 6,095,205   |
| 4.65        | 2.74        | 3.2         | 2.67        | 1.99        | 2.24        | 2.34        | 3.76        | 3.74        | 2.96          | 1.94        |
| 13,028,489  | 29,912,273  | 40,805,430  | 12,732,023  | 18,289,936  | 30,050,380  | 10,487,081  | 10,006,862  | 10,745,264  | 21,057,467    | 15,085,696  |
| 10,266,628  | 20,861,230  | 28,997,270  | 8,876,478   | 11,802,614  | 19,712,597  | 7,101,928   | 7,670,360   | 8,213,675   | 14,921,577    | 9,694,807   |
| 2,761,861   | 9,051,043   | 11,808,160  | 3,855,545   | 6,487,322   | 10,337,783  | 3,385,153   | 2,336,502   | 2,531,589   | 6,135,890     | 5,390,889   |
| 1,526,800   | 2,348,011   | 4,063,337   | 1,214,251   | 1,328,864   | 2,659,834   | 1,054,709   | 1,079,685   | 1,130,837   | 2,845,881     | 1,104,285   |
| 7.93        | 5.74        | 6.8         | 4.08        | 2.97        | 3.62        | 3.17        | 5.3         | 5.37        | 4.14          | 2.67        |
| 1,355,830   | 1,999,617   | 3,542,226   | 975,006     | 993,955     | 2,083,725   | 801,892     | 908,331     | 953,336     | 2,291,727     | 803,627     |
| 939,893     | 1,419,871   | 2,393,958   | 701,185     | 748,694     | 1,485,805   | 571,362     | 674,246     | 678,869     | 1,574,241     | 607,243     |
| 205,317     | 296,536     | 548,079     | 140,485     | 137,258     | 303,202     | 117,299     | 129,304     | 144,179     | 355,364       | 110,076     |
| 79,815      | 110,861     | 216,026     | 52,970      | 48,897      | 114,356     | 46,394      | 45,721      | 55,700      | 141,451       | 39,463      |
| 39,519      | 53,730      | 108,662     | 25,907      | 22,476      | 55,774      | 23,271      | 21,328      | 26,657      | 71,848        | 18,680      |
| 22,387      | 30,405      | 63,309      | 14,353      | 11,974      | 31,008      | 13,472      | 11,246      | 14,680      | 41,900        | 9,815       |
| 14,351      | 19,054      | 40,717      | 9,012       | 6,860       | 19,295      | 8,361       | 6,538       | 8,746       | 26,420        | 5,441       |
| 9,649       | 12,916      | 27,975      | 6,055       | 4,258       | 13,071      | 5,556       | 3,993       | 5,237       | 17,439        | 3,289       |
| 6,754       | 9,102       | 20,376      | 4,220       | 2,874       | 9,262       | 3,703       | 2,672       | 3,510       | 11,951        | 2,036       |
| 5,274       | 6,780       | 15,349      | 3,169       | 1,938       | 6,997       | 2,614       | 1,848       | 2,409       | 8,495         | 1,444       |
| 32,871      | 40,362      | 107,775     | 17,650      | 8,726       | 44,955      | 9,860       | 11,435      | 13,349      | 42,618        | 6,140       |
| 170,970     | 348,394     | 521,111     | 239,245     | 334,909     | 576,109     | 252,817     | 171,354     | 177,501     | 554,154       | 300,658     |
| 144,115     | 292,172     | 437,460     | 199,792     | 277,398     | 478,560     | 194,951     | 141,177     | 138,782     | 424,615       | 241,669     |
| 18,596      | 36,346      | 55,287      | 26,454      | 37,378      | 64,177      | 31,704      | 19,950      | 23,105      | 71,833        | 35,975      |
| 5,104       | 11,409      | 16,646      | 7,952       | 11,918      | 20,014      | 11,978      | 5,994       | 8,442       | 26,757        | 12,341      |
| 1,924       | 4,504       | 6,485       | 2,990       | 4,626       | 7,656       | 5,856       | 2,421       | 3,636       | 13,133        | 5,427       |
| 745         | 2,057       | 2,817       | 1,244       | 2,036       | 3,309       | 3,214       | 1,023       | 1,748       | 7,130         | 2,687       |
| 278         | 1,012       | 1,296       | 461         | 891         | 1,368       | 1,963       | 443         | 902         | 4,180         | 1,305       |
| 116         | 448         | 571         | 217         | 377         | 600         | 1,202       | 200         | 454         | 2,511         | 629         |
| 53          | 217         | 273         | 89          | 161         | 251         | 727         | 72          | 218         | 1,593         | 321         |
| 23          | 115         | 139         | 28          | 65          | 94          | 481         | 45          | 113         | 977           | 151         |
| 16          | 114         | 137         | 18          | 59          | 80          | 741         | 29          | 101         | 1,425         | 153         |

|         |         |           |         |         |         |         |         |         |         |         |
|---------|---------|-----------|---------|---------|---------|---------|---------|---------|---------|---------|
| 415,937 | 579,746 | 1,148,268 | 273,821 | 245,261 | 597,920 | 230,530 | 234,085 | 274,467 | 717,486 | 196,384 |
|---------|---------|-----------|---------|---------|---------|---------|---------|---------|---------|---------|

| LHH0160       | LHH0160V      | LHH0171_0160  | LHES0007H     | LHK0009H_00   | LHH0123_01    | LHM0011_0011H_0014_0014H |
|---------------|---------------|---------------|---------------|---------------|---------------|--------------------------|
| novaseq       | novaseq       | pooled        | hiseq         | pooled        | pooled        | pooled                   |
| hg38          | hg38          | hg38          | hg38          | hg38          | hg38          | hg38                     |
| HCT116-RAD    | HCT116-RAD    | HCT116-RAD21- | H1            | K562          | HepG2         | MCF7                     |
| <b>RNAPII</b> | <b>RNAPII</b> | <b>RNAPII</b> | <b>RNAPII</b> | <b>RNAPII</b> | <b>RNAPII</b> | <b>RNAPII</b>            |
| 363,275,787   | 533,711,372   | 1,462,238,274 | 302061532     | 914,524,429   | 743,739,702   | 716,354,301              |
| 342,116,735   | 503,748,354   | 1,369,337,637 | 269758389     | 739,766,316   | 622,275,298   | 643,504,683              |
| 0.94          | 0.94          | 0.94          | 0.89          | 0.81          | 0.84          | 0.9                      |
| 125,284,102   | 184,849,728   | 503,838,607   | 57451567      | 201,703,349   | 200,525,038   | 178,125,576              |
| 194,175,452   | 282,276,316   | 800,347,653   | 210129518     | 519,892,314   | 374,836,539   | 444,009,576              |
| 150,912,198   | 219,341,332   | 625,261,511   | 171470262     | 391,929,409   | 295,625,450   | 348,697,395              |
| 38,995,470    | 42,335,354    | 99,886,632    | 74426727      | 156,295,365   | 65,026,411    | 154,826,157              |
| 0.74          | 0.81          | 0.84          | 0.57          | 0.6           | 0.78          | 0.56                     |
| 162250996     | 181560853     | 429169409     | 234348256     | 582615618     | 276774478     | 529025826                |
| 104,830       | 107,036       | 128,211       | 28333         | 21,757        | 48,741        | 20,673                   |
| 28,505,332    | 30,964,279    | 68,778,048    | 42233786      | 84,392,579    | 48,372,785    | 87,161,316               |
| 10,490,138    | 11,371,075    | 31,108,584    | 32192941      | 71,902,786    | 16,653,626    | 67,664,841               |
| 7,335,665     | 7,938,284     | 20,986,880    | 26596494      | 44,670,542    | 13,101,973    | 51,270,878               |
| 3,154,473     | 3,432,791     | 10,121,704    | 5596447       | 27,232,244    | 3,551,653     | 16,393,963               |
| 2.33          | 2.31          | 2.07          | 4.75          | 1.64          | 3.69          | 3.13                     |
| 8,330,886     | 8,944,532     | 23,954,192    | 25130789      | 53,688,182    | 10,525,832    | 41,130,149               |
| 5,600,175     | 5,992,254     | 15,370,358    | 20114319      | 31,207,039    | 7,425,655     | 29,048,919               |
| 2,730,711     | 2,952,278     | 8,583,834     | 5016470       | 22,481,143    | 3,100,177     | 12,081,230               |
| 788,470       | 848,627       | 2,468,116     | 2542710       | 6,657,361     | 1,363,984     | 8,765,510                |
| 3.22          | 3.21          | 2.87          | 8.39          | 2.15          | 6.48          | 3.77                     |
| 601,727       | 646,960       | 1,830,733     | 2271974       | 4,546,668     | 1,181,743     | 6,928,170                |
| 447,022       | 460,321       | 1,296,916     | 1740365       | 3,259,054     | 715,177       | 4,747,398                |
| 83,730        | 95,704        | 272,754       | 316246        | 749,303       | 190,897       | 1,251,428                |
| 29,782        | 37,706        | 105,231       | 98702         | 248,839       | 85,424        | 434,829                  |
| 13,881        | 18,228        | 52,271        | 41074         | 106,124       | 47,751        | 184,866                  |
| 7,387         | 9,904         | 29,352        | 20724         | 53,767        | 29,959        | 92,042                   |
| 4,446         | 5,976         | 18,010        | 11989         | 31,609        | 20,048        | 52,045                   |
| 2,868         | 3,820         | 11,678        | 7962          | 19,486        | 14,150        | 32,134                   |
| 1,971         | 2,580         | 7,834         | 5618          | 13,416        | 10,507        | 21,810                   |
| 1,473         | 1,848         | 5,566         | 4046          | 9,735         | 8,000         | 15,658                   |
| 9,167         | 10,873        | 31,121        | 25248         | 55,335        | 59,830        | 95,960                   |
| 186,743       | 201,667       | 637,383       | 36947         | 2,110,693     | 182,241       | 1,837,340                |
| 154,715       | 157,999       | 498,278       | 270736        | 1,725,833     | 139,794       | 1,429,651                |
| 21,426        | 26,041        | 80,906        | 240706        | 292,527       | 22,645        | 291,013                  |
| 6,288         | 9,494         | 28,921        | 23648         | 65,042        | 9,261         | 76,835                   |
| 2,514         | 4,259         | 13,457        | 4828          | 17,418        | 4,635         | 24,538                   |
| 1,059         | 2,044         | 7,092         | 1200          | 5,539         | 2,540         | 8,711                    |
| 416           | 969           | 3,906         | 260           | 2,111         | 1,414         | 3,375                    |
| 181           | 422           | 2,094         | 71            | 940           | 826           | 1,443                    |
| 70            | 215           | 1,190         | 15            | 459           | 479           | 598                      |
| 32            | 110           | 678           | 5             | 216           | 282           | 319                      |
| 42            | 114           | 861           | 1             | 608           | 365           | 857                      |
| 154,705       | 186,639       | 533,817       | 531,609       | 1,287,614     | 466,566       | 2,180,772                |
